# Supplementary material for: Transcription-coupled recruitment of human CHD1 and CHD2 influences chromatin accessibility and histone H3 and H3.3 occupancy at active chromatin regions
Source: PubMed Central journal article supplement (PMC4305392; doi:10.1186/1756-8935-8-4), 2015-01-15

K562

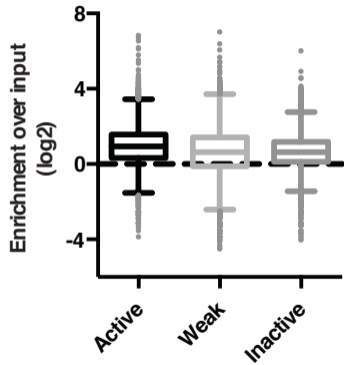

H1 ESCs

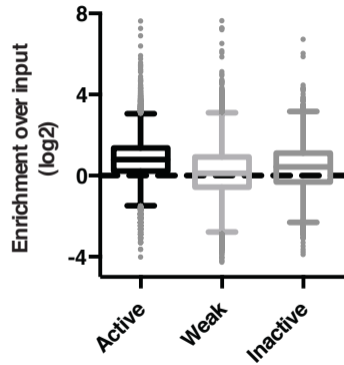

Supplement: 13072_2014_346_MOESM1_ESM.pdf [file 13072_2014_346_MOESM1_ESM.pdf]
