# Supplementary material for: Transcription-coupled recruitment of human CHD1 and CHD2 influences chromatin accessibility and histone H3 and H3.3 occupancy at active chromatin regions
Source: PubMed Central journal article supplement (PMC4305392; doi:10.1186/1756-8935-8-4), 2015-01-15
Supplement: 13072_2014_346_MOESM6_ESM.pdf [file 13072_2014_346_MOESM6_ESM.pdf]

## Supplementary table 1 ENCODE data files used

| Data              | ENCODE Project File                                                                         |
|-------------------|---------------------------------------------------------------------------------------------|
| <b>K562 cells</b> |                                                                                             |
| Chromatin state   | wgEncodeBroadHmmK562HMM.bed                                                                 |
| RNA-seq           | wgEncodeCaltechRnaSeqK562R1x75dAlignsRep1V2.bam                                             |
| Short RNA-seq     | K562_WholeCell_Short_RNA_CSHL_Contig.CSHL_LID10567-001WC-r1.LID10568-002WC-r2.idrFilt0.1.bb |
| Input             | wgEncodeBroadHistoneK562ControlStdAlnRep1.bam                                               |
| Input             | wgEncodeSydhTfbsK562InputIggmusAln.bam                                                      |
| Input             | wgEncodeSydhTfbsK562InputIggrabAln.bam                                                      |
| H3K4me1           | wgEncodeBroadHistoneK562H3k4me1StdAlnRep1.bam                                               |
| H3K4me2           | wgEncodeBroadHistoneK562H3k4me2StdAlnRep1.bam                                               |
| H3K4me3           | wgEncodeBroadHistoneK562H3k4me3StdAlnRep1.bam                                               |
| CHD1              | wgEncodeBroadHistoneK562Chd1a301218aStdAlnRep1.bam                                          |
| CHD2              | wgEncodeSydhTfbsK562Chd2ab68301IggrabAlnRep1.bam                                            |
| Pol II            | wgEncodeSydhTfbsK562Pol2IggmusAlnRep1.bam                                                   |
| BRF1              | wgEncodeSydhTfbsK562Brf1StdAlnRep1.bam                                                      |
| BRF2              | wgEncodeSydhTfbsK562Brf2StdAlnRep1.bam                                                      |
| DNase-seq         | wgEncodeOpenChromDnaseK562AlnRep1V2.bam                                                     |
| MNase-seq         | wgEncodeSydhNsomeK562AlnRep1.bam                                                            |
| <b>H1 ESCs</b>    |                                                                                             |
| Chromatin state   | wgEncodeBroadHmmH1hescHMM.bed                                                               |
| Input             | wgEncodeBroadHistoneH1hescControlStdAlnRep1.bam                                             |
| Input             | wgEncodeSydhTfbsH1hescInputIggrabAln.bam                                                    |
| CHD1              | wgEncodeBroadHistoneH1hescChd1a301218aStdAlnRep2.bam                                        |
| CHD2              | wgEncodeSydhTfbsH1hescChd2IggrabAlnRep1.bam                                                 |
| <b>GM12878</b>    |                                                                                             |
| Chromatin state   | wgEncodeBroadHmmGm12878HMM.bed                                                              |
| Input             | wgEncodeBroadHistoneGm12878ControlStdAlnRep1.bam                                            |
| Input             | wgEncodeSydhTfbsGm12878InputIggmusAlnRep1.bam                                               |
| CHD1              | wgEncodeSydhTfbsGm12878Chd1a301218aIggmusAlnRep1.bam                                        |
| CHD2              | wgEncodeSydhTfbsGm12878Chd2ab68301IggmusAlnRep1.bam                                         |
