# Supplementary material for: Transcription-coupled recruitment of human CHD1 and CHD2 influences chromatin accessibility and histone H3 and H3.3 occupancy at active chromatin regions
Source: PubMed Central journal article supplement (PMC4305392; doi:10.1186/1756-8935-8-4), 2015-01-15
Supplement: 13072_2014_346_MOESM7_ESM.pdf [file 13072_2014_346_MOESM7_ESM.pdf]

**Supplementary table 2 qPCR primers used in DNase-qPCR and H3 and H3.3 ChIP-qPCR**

| <b>Region</b>               | <b>Forward</b>          | <b>Reverse</b>        |
|-----------------------------|-------------------------|-----------------------|
| <b>TSS DHS sites</b>        |                         |                       |
| C1ORF159                    | GAAGCGCCCTGGGAAATGTA    | GGGAATGTAGTCCCTCCGTG  |
| EGR1                        | CTGCTCAGTTCGTGCTCACT    | CTCCTCGCTCCTCCTCCC    |
| NPM1                        | GCGAGGTAGAAAGGAGTGGG    | GACGGAATCACACCAGGGAA  |
| GCAT                        | ACAAGTCAAGCCTCTCGGTC    | TCGCTTAAAAAGGCGGGGAG  |
| NRAS                        | CCCGCTACGTAATCAGTCGG    | CATGACTCGTGGTTCCGAGG  |
| HGB1                        | TTCTTCATCCCTAGCCAGCC    | CCTTGCCTTGACCAATAGCC  |
| PIN1                        | AGGGATAACGTGGGAGGGTC    | CTAACGGTCCGGATTGGCTT  |
| HES4                        | CCTCAGGCCGTTTCCCTATT    | GCGAGTGTGGGAAAGAATGC  |
| H3F3B                       | TGACATCCCCGACACAAAG     | GCCAATCAGCGGCGTAGATA  |
| OGG1                        | CGCCACCCTGATTTCTCAT     | AACCACCGCTCATTTACCT   |
| HGB2                        | GTGTGGAAGTCTGAAGGGT     | GCCTTGCCTTGACCAATAGC  |
| NCL                         | TGAAGATCCCGGAGCACGTA    | TTCCACAGGCGATTACTGGG  |
| KIAA0895L                   | AAATGAGAGGGTGTGGCCTG    | TTCCCATTGGCTCTTCACC   |
| DNMT3B                      | CCGAGCGATTTCAAATTTCCCT  | GAGTGGGTGGGGAGGGG     |
| BZRAPP                      | AATAGGAAGTCGGCTGCTGG    | CTGCTCTTCTTCTGTCCCC   |
|                             |                         |                       |
| <b>Intra and Intergenic</b> |                         |                       |
|                             |                         |                       |
| Intragenic 1                | TTTGCATGGGGCTCATTTC     | GGATTGACAGTGGCTCCTCC  |
| Intragenic 2                | CGTGCGGTGAGCGGG         | CAGCCTCGCTCCATCTCATA  |
| Intragenic 3                | GTCAGGTGGTCAGCTTCTCC    | CTGGCTCAAGCACAGCAATG  |
| Intragenic 4                | CAGGACAGGACGGGGAATTT    | AAGTGGCGGTGATTACCCTG  |
| Intragenic 5                | CAGAACAACACTCACAGGCAACG | GAAGGGGGAAGGATCCAAGC  |
| Intragenic 6                | TGGAAGGGAAGTCCGAAGGA    | CCATCTCTCCCGGTGCAACA  |
|                             |                         |                       |
| Intergenic 1                | CTGCTGCCGCATTTTCCCTT    | AGATAAGGCCTCTGGCTGGA  |
| Intergenic 2                | CCACTCTCCTCATCCCTCCA    | TACGACTTCAGGCTCTGGGT  |
| Intergenic 3                | TGGAACCGGTGTCTGCTAC     | CCAGCGGTCTTTTCCACCTC  |
| Intergenic 4                | TCAGCGGAGAGTACCTGGTT    | GTTTAGGGATGCTGCCACCT  |
| Intergenic 5                | GGTCGGCCTCGGGTCT        | GGGCCGCAGAAACACCA     |
| Intergenic 6                | ATGCCTGCGAGGATGGAAAA    | ACTCTGCTCACCAAACCTGG  |
| Intergenic 7                | CTCCCACTGCCTTCTGTTGT    | CTGTGAGCACGGACATAGCC  |
| Intergenic 8                | AGCTTATTCAGTGCCTGGGG    | GGGAAAGGTCAGATGCGAGG  |
| Intergenic 9                | GTCCTGACCTGGCCACC       | GTCGAGGAAGTGGCGTTTTTC |
|                             |                         |                       |
| <b>Active tRNA</b>          |                         |                       |
|                             |                         |                       |
| tRNA 1                      | ACACCCCACCACTATCTCCA    | TTCTTCCAGGTGCCTCAAC   |
| tRNA 2                      | CCCACCAATATCTCCACCCAC   | CCAGATGCCAATGATTGCGG  |
| tRNA 3                      | ACTCCAGTTTCTTGCCAGG     | GCCACGACTACACGAATGGA  |
| tRNA 4                      | CGTTGCCAGTGAAGGAGGAT    | GCCCCTCTCTAATTCTGCC   |
| tRNA 5                      | TAGACGGAACCAAGTGCCTC    | CCTTCATTCTCGGACGCTT   |
| tRNA 6                      | CGGGTGAAGGAAAACCTGGGA   | CAAACGGCATGCTTTGTGGA  |
